# Supplementary material for: A Rapid Review of Environmental Health Gaps in Antimicrobial Resistance and Water-Related Research from 1990–2020
Source: MDPI journal article supplement (doi:10.3390/ijerph19116549), 2022-05-27
Supplement: s1 [file s1]

**Table S1: Database Search Keywords and Search Strings**

- Keywords/search terms per concepts: AND across, OR down.
- Keywords based on literature from the pharmaceutical, medical, agricultural and water industries.
- Limitations: (1) search of Title, Abstract and subject headings/keywords only; and (2) publication period from 1990-2020.

|                                                                                                                                     |            |                                                                                                                                                                                                                    |            |                                                                                                                                                                                                                                           |
|-------------------------------------------------------------------------------------------------------------------------------------|------------|--------------------------------------------------------------------------------------------------------------------------------------------------------------------------------------------------------------------|------------|-------------------------------------------------------------------------------------------------------------------------------------------------------------------------------------------------------------------------------------------|
| <b>Antimicrobial Resistance (AMR)</b><br><i>AMR synonyms</i>                                                                        | <b>AND</b> | <b>AMR-associated science</b><br><i>(1) topics (e.g. risk factors, gene transfer);<br/>(2) sector-specific terms, actions or methods employed (e.g. genom* analysis, treat*), including analytical frameworks.</i> | <b>AND</b> | <b>AMR-associated interventions</b><br><i>(1) actions addressing resistance;<br/>(2) programs (e.g. antimicrobial stewardship); and<br/>(3) Impact.<br/>Can possibly include (4) policy outputs. (Decided to exclude.)</i>                |
| (antibiot* or “anti-biot*” or “anti-microbial*” or antimicrobial* or drug or pandrug or “pan-drug” or “multi-drug”) W/2 (resistan*) |            | <b>Mechanisms of organism resistance:</b><br><br>(mutat* or “natural selection” or emerg*) W/3 (spread or transmi*)                                                                                                |            | <b>Addressing resistance (I.e. AMR function):</b><br><br>(remov* or target* or treat* or reduc* or prevent* or mitiga* or control or manage*) W/2 (antibiot* or “anti-biot*” or antimicrob* or “anti-microb*”)                            |
|                                                                                                                                     |            | <b>Human risk factors:</b><br><br>(diagnos* or prescrib* or overuse or dispens* or misuse or consum* or inject*) W/2 (antibiot* or “anti-biot*” or antimicrob* or “anti-microb*”)                                  |            | (remov* or target* or treat* or reduc* or prevent* or mitiga* or control or manage*) W/3 resist*                                                                                                                                          |
|                                                                                                                                     |            | <b>Economic risk factors:</b><br><br>(manufact* or distribut* or agriculture or aquaculture or agricultur* or processing or transport*) W/3 (antibiot* or “anti-biot*” or antimicrob* or “anti-microb*”)           |            | <b>Programs/Interventions:</b><br><br>program* or surveillance or “antimicrobial stewardship” or “anti-microbial stewardship” or “antibiotic stewardship” or “anti-biotic stewardship” or “behavio* chang*” or “research and development” |
|                                                                                                                                     |            | <b>Environmental sources/reservoirs of resistance:</b><br><br>(environment* or soil or water or feed or fertiliser* or fertilizer* or manure or waste or sewage) W/2 (contamina* or pollut*)                       |            | <b>Societal impact / academic contribution:</b><br><br>“public health” or “environmental sanitation” or “environmental health” or “planetary health” or “one health” or “implementation science”                                          |
|                                                                                                                                     |            | <b>Evaluation of resistance or defense:</b>                                                                                                                                                                        |            | <b>Policy outputs:</b>                                                                                                                                                                                                                    |

|  |  |                                                                                                                                                                |  |                                                             |
|--|--|----------------------------------------------------------------------------------------------------------------------------------------------------------------|--|-------------------------------------------------------------|
|  |  | (“susceptibility test*” or “sensitivity test” or peptide or screen* or detect* or inactivat*) W/2 (antibiot* or “anti-biot*” or antimicrob* or “anti-microb”*) |  | protocol or regulat* or standard* or guideline* or strateg* |
|--|--|----------------------------------------------------------------------------------------------------------------------------------------------------------------|--|-------------------------------------------------------------|

**Table S2: AMR Theme Classification Keywords**

|                                        | General keywords (1 point each)                                                                                                                                                                                   | And keywords (1 point each)                                                                                                                                                                                                                                      | Not keywords (-1 point each mention)                                                                                                                                                                                                                                                                                                                                                                                                                                                                                                                                                                                                                                                                                                                                                                                                                                     |
|----------------------------------------|-------------------------------------------------------------------------------------------------------------------------------------------------------------------------------------------------------------------|------------------------------------------------------------------------------------------------------------------------------------------------------------------------------------------------------------------------------------------------------------------|--------------------------------------------------------------------------------------------------------------------------------------------------------------------------------------------------------------------------------------------------------------------------------------------------------------------------------------------------------------------------------------------------------------------------------------------------------------------------------------------------------------------------------------------------------------------------------------------------------------------------------------------------------------------------------------------------------------------------------------------------------------------------------------------------------------------------------------------------------------------------|
| Human infection prevention and control | infection, prevention, control, personal, protective, equipment, PPE, disinfection, sterilization, sanitization, cleaning, washing, mask, hospital-acquired, nosocomial, HIV, AIDs, viral, antiviral, prophylaxis | human, children, infant, adult, student, doctor, nurse, dentist, pharmacist, patient, resident, hospital, ICU, long-term, clinic, clinician, health-care, healthcare, health, facility, surface, contact, hygiene                                                | use, usage, consumption, consume, prescribe, overuse, misuse, access, dosage, practice, prescription, immunization, vaccine, slaughter, butcher, butchery, packaging, retail, street, grocery, food, foodborne, food-borne, pork, beef, dairy, mutton, meat, seafood, shops, store, market, food-producing, slaughterhouse                                                                                                                                                                                                                                                                                                                                                                                                                                                                                                                                               |
| Human consumption of antimicrobials    | use, usage, consumption, consume, prescribe, overuse, misuse, treatment, dosage, access, practice, prescription, stewardship, immunization, vaccine, behaviour, behavior, decision                                | human, children, infant, adult, student, doctor, nurse, dentist, pharmacist, patient, resident, hospital, ICU, long-term, clinic, clinician, health-care, healthcare, health, facility, physician                                                                | infection, prevention, personal, protective, equipment, PPE, disinfection, sterilization, sanitization, cleaning, washing, mask, hospital-acquired, nosocomial, HIV, AIDs, viral, antiviral, prophylaxis, surface, contact, hygiene, probiotic, farm, farmland, aquaculture, aquacultural, husbandry, veterinary, zoonotic, zoonoses, zoonosis, CAFO, concentrated, feeding, operation, confined, manure, excreta, excrement, animal, livestock, poultry, bird, rabbit, pig, cow, bovine, ovine, lamb, fish, chicken, piglet, shrimp, oyster, pet, companion, canine, feline, cats, dogs, feces, cattle, wildlife, boar, broiler, mammals, horses, pesticide, herbicide, fungicide, biocide, fertilizer, agriculture, agricultural, pond, tank, nursery, horticulture, harvest, plant, fruit, vegetable, crop, leaf, leaves, legume, root, produce, seaweed, kelp, algae |
| Clean water & sanitation               | karst, river, lake, stream, marine, groundwater, influent, drinking, potable, water, wastewater, waste, sewage, effluent, landfill, aquifer                                                                       | contamination, manure, excrement, excreta, excrement, leach, leachate, pollution, run-off, runoff, feces, treatment, removal, filtration, chlorination, ultraviolet, irradiation, oxidation, transmission, clean, sanitation, supply, source, surface, reservoir | wildlife, eDNA, environment, ecology, ecosystem, soil                                                                                                                                                                                                                                                                                                                                                                                                                                                                                                                                                                                                                                                                                                                                                                                                                    |

|                                                                 |                                                                                                                                                                                                                                                                                                                                                                                                                                                           |                                                                                                                                                                                                                                                                                                                                                                                                                    |                                                                                                                                                                                                                                                                                                                                                                                                                                                                                                                                                              |
|-----------------------------------------------------------------|-----------------------------------------------------------------------------------------------------------------------------------------------------------------------------------------------------------------------------------------------------------------------------------------------------------------------------------------------------------------------------------------------------------------------------------------------------------|--------------------------------------------------------------------------------------------------------------------------------------------------------------------------------------------------------------------------------------------------------------------------------------------------------------------------------------------------------------------------------------------------------------------|--------------------------------------------------------------------------------------------------------------------------------------------------------------------------------------------------------------------------------------------------------------------------------------------------------------------------------------------------------------------------------------------------------------------------------------------------------------------------------------------------------------------------------------------------------------|
| Environmental contamination                                     | wildlife, remediation, removal, eDNA, environment, ecology, ecosystem, soil                                                                                                                                                                                                                                                                                                                                                                               | contamination, manure, excrement, excreta, excrement, leach, leachate, pollution, runoff, runoff, sewage, feces, transmission, reservoir                                                                                                                                                                                                                                                                           | karst, river, lake, stream, marine, influent, drinking, potable, water, wastewater, effluent, landfill, aquifer                                                                                                                                                                                                                                                                                                                                                                                                                                              |
| Food safety & security                                          | slaughter, butcher, butchery, packaging, retail, street, grocery, food, foodborne, food-borne, pork, beef, dairy, mutton, meat, seafood, shops, store, market, food-producing, slaughterhouse                                                                                                                                                                                                                                                             | contamination, surface, hygiene, animal, chickens, farm, consumption, supply, safety, security, production, chain, handling, processing, import, export                                                                                                                                                                                                                                                            |                                                                                                                                                                                                                                                                                                                                                                                                                                                                                                                                                              |
| Use of antimicrobials in animals                                | use, usage, consumption, consume, prescribe, overuse, misuse, treatment, dosage, access, practice, prescription, stewardship, immunization, vaccine, behaviour, behavior                                                                                                                                                                                                                                                                                  | probiotic, farm, farmland, aquaculture, aquacultural, husbandry, veterinary, zoonotic, zoonoses, zoonosis, CAFO, concentrated, feeding, operation, confined, manure, excreta, excrement, animal, livestock, poultry, bird, rabbit, pig, cow, bovine, ovine, lamb, fish, chicken, piglet, shrimp, oyster, pet, companion, canine, feline, cats, dogs, feces, cattle, wildlife, wild, boar, broiler, mammals, horses | human, children, infant, adult, student, doctor, nurse, dentist, pharmacist, patient, resident, hospital, ICU, long-term, clinic, clinician, health-care, healthcare, health, facility, physician, pesticide, herbicide, fungicide, biocide, fertilizer, manure, agriculture, agricultural, pond, tank, nursery, horticulture, harvest, plant, fruit, vegetable, crop, leaf, leaves, legume, root, produce, seaweed, kelp, algae                                                                                                                             |
| Use of antimicrobials in plants                                 | use, usage, consumption, consume, prescribe, overuse, misuse, treatment, dosage, access, practice, prescription, stewardship, immunization, vaccine, behaviour, behavior                                                                                                                                                                                                                                                                                  | pesticide, herbicide, fungicide, biocide, fertilizer, manure, farm, agriculture, agricultural, aquaculture, aquacultural, pond, tank, nursery, horticulture, harvest, plant, fruit, vegetable, crop, leaf, leaves, legume, root, produce, seaweed, kelp, algae                                                                                                                                                     | human, children, infant, adult, student, doctor, nurse, dentist, pharmacist, patient, resident, hospital, ICU, long-term, clinic, clinician, health-care, healthcare, health, facility, physician, probiotic, husbandry, veterinary, zoonotic, zoonoses, zoonosis, CAFO, concentrated, feeding, operation, confined, excreta, excrement, animal, livestock, poultry, bird, rabbit, pig, cow, bovine, ovine, lamb, fish, chicken, piglet, shrimp, oyster, pet, companion, canine, feline, cats, dogs, feces, cattle, wildlife, boar, broiler, mammals, horses |
| Antimicrobial agents, drugs, and tools research and development | research, development, R&D, genesis, evolution, sequence, nanotechnology-based, trend, model, deterministic, review, scope, study, detect, diagnostic, mutation, alternative, agent, susceptibility, activity, activation, activate, activator, deactivate, deactivation, deactivator, inactivation, inactivate, mechanism, gene, genome, genomic, genotype, nucleotide, peptide, plasmid, serotype, serovar, pathogen, carbapenem, biofilm, efflux, pump | antibiotic, antimicrobial, antibacterial, anti-biotic, anti-microbial, anti-bacterial, multidrug, multi-drug, drug, vaccine, therapeutic, novel, method                                                                                                                                                                                                                                                            | use, usage, consumption, consume, prescribe, overuse, misuse, dosage, access, practice, prescription, stewardship, behaviour, behavior, infection, prevention, control, personal, protective, equipment, PPE, disinfection, sterilization, sanitization, cleaning, washing, mask, hospital-acquired, nosocomial, HIV, AIDs, viral, antiviral, prophylaxis, surface, contact, hygiene                                                                                                                                                                         |

**Table S3: Water Type Classification Keywords**

| Water Code | Subcategory       | Keywords                                                                                                        |
|------------|-------------------|-----------------------------------------------------------------------------------------------------------------|
| Source     | Surface Water     | surface, river, lake, stream, tributary, creek                                                                  |
|            | Marine Water      | sea, ocean, saline, estuary, brackish, salt                                                                     |
|            | Groundwater       | aquifer, groundwater, confined, unconfined, granular, alluvial                                                  |
|            | Karst Groundwater | Karst, aquifer, groundwater, limestone, carbonate, dissolution-type, landscape                                  |
| Supply     | Municipal         | household, drinking, human, treatment, distribution, regulated                                                  |
|            | Well              | well, private, self-regulated                                                                                   |
|            | Self-supplied     | glacier, fog, rainwater, cistern, river                                                                         |
| Wastewater | Agricultural      | Irrigation, run-off, animal, waste, manure, feed, by-product, pesticides, herbicides, insecticides, nutrient    |
|            | Industrial        | industrial, waste, heavy, metals, high, dissolved, solids, organic, compounds, toxic, energy, production        |
|            | Municipal         | wastewater, sewage, wastewater, treatment, plant, household, human, waste, primary, secondary, tertiary         |
|            | Pharmaceutical    | drug, development, antibiotic, byproduct                                                                        |
|            | Stormwater        | surface, runoff, urban, industrial, agriculture, nonpoint, source, precipitation, rainfall, drainage, injection |
|            | Hospital          | clinical, waste, antibiotics, viruses                                                                           |

**Table S4: Geographic Information Categorization Keywords**

| Regions                   | Keywords                                                                                                                                                                                                                                                                                                                                                                                                                             |
|---------------------------|--------------------------------------------------------------------------------------------------------------------------------------------------------------------------------------------------------------------------------------------------------------------------------------------------------------------------------------------------------------------------------------------------------------------------------------|
| Sub-Saharan Africa        | Benin, Botswana, Burkina Faso, Cameroon, Cape Verde, Central African Republic, Chad, Comoros, Democratic Republic of Congo, Eswatini, Ethiopia, Gabon, Ghana, Guinea-Bissau, Ivory Coast, Kenya, Lesotho, Madagascar, Malawi, Republic of Congo, Rwanda, South Africa, Sudan, Tanzania, Zambia, Zimbabwe                                                                                                                             |
| Latin America & Caribbean | Argentina, Bolivia, Brazil, Chile, Colombia, Costa Rica, Cuba, Jamaica, Mexico, Peru, Puerto Rico, Suriname, Trinidad and Tobago                                                                                                                                                                                                                                                                                                     |
| East Asia & Pacific       | Australia, Brunei, Cambodia, China, East Timor, Indonesia, Japan, Malaysia, Myanmar, New Zealand, Philippines, Singapore, South Korea, Taiwan, Thailand, Vanuatu, Vietnam                                                                                                                                                                                                                                                            |
| Europe & Central Asia     | Albania, Austria, Azerbaijan, Belarus, Belgium, Bosnia and Herzegovina, Bulgaria, Croatia, Czech Republic, Denmark, Estonia, Finland, France, Georgia, Germany, Greece, Hungary, Iceland, Ireland, Italy, Kazakhstan, Kosovo, Kyrgyzstan, Latvia, Lithuania, Luxembourg, Montenegro, Netherlands, Norway, Poland, Portugal, Romania, Russia, Serbia, Slovakia, Slovenia, Spain, Sweden, Switzerland, Turkey, Ukraine, United Kingdom |
| North America             | Canada, United States                                                                                                                                                                                                                                                                                                                                                                                                                |
| South Asia                | Afghanistan, Bangladesh, Bhutan, India, Nepal, Pakistan, Sri Lanka                                                                                                                                                                                                                                                                                                                                                                   |

|                                    |                                                                                                                                                                                                                                                                                                                                                                                                                                                                         |
|------------------------------------|-------------------------------------------------------------------------------------------------------------------------------------------------------------------------------------------------------------------------------------------------------------------------------------------------------------------------------------------------------------------------------------------------------------------------------------------------------------------------|
| Middle East & North Africa         | Algeria, Bahrain, Egypt, Iran, Iraq, Israel, Jordan, Lebanon, Morocco, Oman, Palestine, Saudi Arabia, Tunisia, United Arab Emirates                                                                                                                                                                                                                                                                                                                                     |
| <b>Income level classification</b> | <b>Keywords</b>                                                                                                                                                                                                                                                                                                                                                                                                                                                         |
| High Income Country (HIC)          | Australia, Austria, Bahrain, Belgium, Brunei, Canada, Chile, Croatia, Czech Republic, Denmark, Estonia, Finland, France, Germany, Greece, Hungary, Iceland, Ireland, Israel, Italy, Japan, Latvia, Lithuania, Luxembourg, Netherlands, New Zealand, Norway, Oman, Poland, Portugal, Puerto Rico, Saudi Arabia, Singapore, Slovakia, Slovenia, South Korea, Spain, Sweden, Switzerland, Taiwan, Trinidad and Tobago, United Arab Emirates, United Kingdom, United States |
| Upper Middle-Income Country (UMIC) | Albania, Argentina, Azerbaijan, Belarus, Bosnia and Herzegovina, Botswana, Brazil, Bulgaria, China, Colombia, Costa Rica, Cuba, Gabon, Georgia, Iraq, Jamaica, Jordan, Kazakhstan, Kosovo, Lebanon, Malaysia, Mexico, Montenegro, Peru, Romania, Russia, Serbia, South Africa, Suriname, Thailand, Turkey                                                                                                                                                               |
| Lower Middle-Income Country (LMIC) | Algeria, Bangladesh, Benin, Bhutan, Bolivia, Cambodia, Cameroon, Cape Verde, Comoros, East Timor, Egypt, Eswatini, Ghana, India, Indonesia, Iran, Ivory Coast, Kenya, Kyrgyzstan, Lesotho, Morocco, Myanmar, Nepal, Pakistan, Palestine, Philippines, Republic of Congo, Sri Lanka, Tanzania, Tunisia, Ukraine, Vanuatu, Vietnam, Zambia, Zimbabwe                                                                                                                      |
| Least Developed Country (LDC)      | Afghanistan, Burkina Faso, Central African Republic, Chad, Democratic Republic of Congo, Ethiopia, Guinea-Bissau, Madagascar, Malawi, Rwanda, Sudan                                                                                                                                                                                                                                                                                                                     |

**Table S5: Countries focused on AMR research and interventions from 1990-2020 by World Bank region and income classification**

| Region                | Country     | Income Level        |
|-----------------------|-------------|---------------------|
| East Asia and Pacific | Australia   | High Income         |
|                       | Brunei      | High Income         |
|                       | Cambodia    | Lower Middle-Income |
|                       | China       | Upper Middle-Income |
|                       | East Timor  | Lower Middle-Income |
|                       | Indonesia   | Lower Middle-Income |
|                       | Japan       | High Income         |
|                       | Malaysia    | Upper Middle-Income |
|                       | Myanmar     | Lower Middle-Income |
|                       | New Zealand | High Income         |
|                       | Philippines | Lower Middle-Income |
|                       | Singapore   | High Income         |
|                       | South Korea | High Income         |
|                       | Taiwan      | High Income         |
|                       | Thailand    | Upper Middle-Income |
|                       | Vanuatu     | Lower Middle Income |
|                       | Vietnam     | Lower Middle Income |

|                             |                     |                     |
|-----------------------------|---------------------|---------------------|
| Europe and Central Asia     | Albania             | Upper Middle-Income |
|                             | Austria             | High Income         |
|                             | Azerbaijan          | Upper Middle-Income |
|                             | Belarus             | Upper Middle-Income |
|                             | Belgium             | High Income         |
|                             | Bosnia and Herz.    | Upper Middle-Income |
|                             | Bulgaria            | Upper Middle-Income |
|                             | Croatia             | High Income         |
|                             | Czech Republic      | High Income         |
|                             | Denmark             | High Income         |
|                             | Estonia             | High Income         |
|                             | Finland             | High Income         |
|                             | France              | High Income         |
|                             | Georgia             | Upper Middle-Income |
|                             | Germany             | High Income         |
|                             | Greece              | High Income         |
|                             | Hungary             | High Income         |
|                             | Iceland             | High Income         |
|                             | Ireland             | High Income         |
|                             | Italy               | High Income         |
|                             | Kazakhstan          | Upper Middle-Income |
|                             | Kosovo              | Upper Middle-Income |
|                             | Kyrgyzstan          | Lower Middle-Income |
|                             | Latvia              | High Income         |
|                             | Lithuania           | High Income         |
|                             | Luxembourg          | High Income         |
|                             | Montenegro          | Upper Middle-Income |
|                             | Netherlands         | High Income         |
|                             | Norway              | High Income         |
|                             | Poland              | High Income         |
|                             | Portugal            | High Income         |
|                             | Romania             | Upper Middle-Income |
|                             | Russia              | Upper Middle-Income |
|                             | Saudi Arabia        | Upper Middle-Income |
|                             | Slovakia            | High Income         |
|                             | Slovenia            | High Income         |
|                             | Spain               | High Income         |
|                             | Sweden              | High Income         |
|                             | Switzerland         | High Income         |
|                             | Turkey              | Upper Middle-Income |
|                             | Ukraine             | Lower Middle Income |
|                             | United Kingdom      | High Income         |
| Latin America and Caribbean | Argentina           | Upper Middle-Income |
|                             | Bolivia             | Lower Middle-Income |
|                             | Brazil              | Upper Middle-Income |
|                             | Chile               | High Income         |
|                             | Colombia            | Upper Middle-Income |
|                             | Costa Rica          | Upper Middle-Income |
|                             | Cuba                | Upper Middle-Income |
|                             | Jamaica             | Upper Middle-Income |
|                             | Mexico              | Upper Middle-Income |
|                             | Peru                | Upper Middle-Income |
|                             | Puerto Rico         | High Income         |
|                             | Suriname            | Upper Middle-Income |
|                             | Trinidad and Tobago | High Income         |

|                              |                          |                     |
|------------------------------|--------------------------|---------------------|
|                              |                          |                     |
| Middle East and North Africa | Algeria                  | Lower Middle-Income |
|                              | Bahrain                  | High Income         |
|                              | Egypt                    | Lower Middle-Income |
|                              | Iran                     | Lower Middle-Income |
|                              | Iraq                     | Upper Middle-Income |
|                              | Israel                   | High Income         |
|                              | Jordan                   | Upper Middle-Income |
|                              | Lebanon                  | Upper Middle-Income |
|                              | Morocco                  | Lower Middle-Income |
|                              | Oman                     | High Income         |
|                              | Palestine                | Lower Middle-Income |
|                              | S. Sudan                 | High Income         |
|                              | Tunisia                  | Lower Middle Income |
|                              | United Arab Emirates     | High Income         |
| North America                | Canada                   | High Income         |
|                              | United States of America | High Income         |
| South Asia                   | Afghanistan              | Least Developed     |
|                              | Bangladesh               | Lower Middle-Income |
|                              | Bhutan                   | Lower Middle-Income |
|                              | India                    | Lower Middle-Income |
|                              | Nepal                    | Lower Middle-Income |
|                              | Pakistan                 | Lower Middle-Income |
|                              | Sri Lanka                | Lower Middle-Income |
| Sub-Saharan Africa           | Benin                    | Lower Middle-Income |
|                              | Botswana                 | Upper Middle-Income |
|                              | Burkina Faso             | Least Developed     |
|                              | Cameroon                 | Lower Middle-Income |
|                              | Cape Verde               | Lower Middle-Income |
|                              | Central African Rep.     | Least Developed     |
|                              | Chad                     | Least Developed     |
|                              | Comoros                  | Lower Middle-Income |
|                              | Dem. Rep. Congo          | Least Developed     |
|                              | eSwatini                 | Lower Middle-Income |
|                              | Ethiopia                 | Least Developed     |
|                              | Gabon                    | Upper Middle-Income |
|                              | Ghana                    | Lower Middle-Income |
|                              | Guinea-Bissau            | Least Developed     |
|                              | Ivory Coast              | Lower Middle-Income |
|                              | Kenya                    | Lower Middle-Income |
|                              | Lesotho                  | Lower Middle-Income |
|                              | Madagascar               | Least Developed     |
|                              | Malawi                   | Least Developed     |
|                              | Republic of Congo        | Lower Middle-Income |
|                              | Rwanda                   | Least Developed     |
|                              | South Africa             | Upper Middle-Income |
|                              | Sudan                    | Least Developed     |
|                              | Tanzania                 | Lower Middle-Income |
|                              | Zambia                   | Lower Middle Income |
|                              | Zimbabwe                 | Lower Middle Income |
